# Supplementary material
Source: Research Square preprint supplement (doi:10.21203/rs.3.rs-9501370/v1)
Supplement: Supplementary file 2 [file df901750e756373d423eb6e7.docx]

**Identification of studies via databases and registers**

Records removed *before screening*:

Duplicate records removed

(n = 324)

Records marked as ineligible by automation tools (n = 0)

Records removed for other reasons (n = 0)

Records identified from*:

Databases:
PubMed (n = 388)

Google Scholar (n = 200)

Scopus (n = 297)

Total (n = 885)

**Identification**

Records screened

(n = 561)

Records excluded**

(n = 373)

Reports sought for retrieval

(n = 188)

Reports not retrieved

(n = 97)

**Screening**

Reports excluded: (n=47)

Not in English (n = 18)

SLE was not confirmed

(n = 19)

Age less than 18 years

(n = 6)

Irrelevant to our subject/Incomplete information

(n = 4)

Reports assessed for eligibility

(n = 91)

Studies included in review

(n = 44)

Reports of included studies

(n =41)

**Included**

*Consider, if feasible to do so, reporting the number of records identified from each database or register searched (rather than the total number across all databases/registers).

**If automation tools were used, indicate how many records were excluded by a human and how many were excluded by automation tools.

Source: Page MJ, et al. BMJ 2021;372:n71. doi: 10.1136/bmj.n71.

This work is licensed under CC BY 4.0. To view a copy of this license, visit <https://creativecommons.org/licenses/by/4.0/>
