# Supplementary material
Source: Research Square preprint supplement (doi:10.21203/rs.3.rs-9501370/v1)
Supplement: Supplementary file 3 [file e116d97c5ecdbd85be550ac8.docx]

**Supplementary Material**

Supplementary Table 1. Full electronic search strategies.

| **Database / platform** | **Coverage dates** | **Date last searched** | **Search string exactly as run** | **Filters / limits** | **Records retrieved** |
| --- | --- | --- | --- | --- | --- |
| PubMed | |  | | --- |  | From inception to 25 August 2025 | | --- | | 25 August 2025 | ("Libman-Sacks Endocarditis"[Title/Abstract] OR "Libman-Sacks"[Title/Abstract] OR "nonbacterial thrombotic endocarditis"[Title/Abstract] OR NBTE[Title/Abstract]) AND ("Systemic Lupus Erythematosus"[Title/Abstract] OR SLE[Title/Abstract] OR lupus[Title/Abstract]) | No database filters reported; English-language restriction applied during eligibility screening | 388 |
| Scopus | From inception to 25 August 2025 | 25 August 2025 | TITLE-ABS-KEY("Libman-Sacks endocarditis" OR "Libman-Sacks" OR "nonbacterial thrombotic endocarditis" OR NBTE) AND TITLE-ABS-KEY("systemic lupus erythematosus" OR SLE OR lupus) | No database filters reported; English-language restriction applied during eligibility screening | 297 |
| Google Scholar | From inception to 25 August 2025 | 25 August 2025 | "Libman-Sacks endocarditis" OR "Libman-Sacks" OR "nonbacterial thrombotic endocarditis" OR NBTE AND "systemic lupus erythematosus" OR SLE OR lupus | Results screened by relevance | 200 |

Google Scholar was searched as a supplementary source, and results were screened by relevance.

Supplementary Table 2. JBI critical appraisal of included case reports

| Study (Author, Year) | Q1 Demo | Q2 History | Q3 Condition | Q4 Diagnostics | Q5 Treatment | Q6 Post-tx | Q7 Adverse events | Q8 Lessons |
| --- | --- | --- | --- | --- | --- | --- | --- | --- |
| Tanawuttiwat, 2011 | Yes | Yes | Yes | Yes | Yes | Yes | Yes | No |
| Abouelela, 2021 | No | Yes | Yes | Yes | Yes | Yes | No | No |
| Ahmed, 2020 | No | Yes | Yes | Yes | Yes | Yes | No | Yes |
| Chen, 2023 | No | Yes | Yes | Yes | Yes | Yes | No | Yes |
| Gan, 2022 | No | Yes | Yes | Yes | Yes | Yes | No | Yes |
| Ningyan, 2021 | No | Yes | Yes | Yes | Yes | Yes | No | Yes |
| Hachiya, 2014 | No | Yes | Yes | Yes | Yes | Yes | No | No |
| Ichikawa-Ogura, 2025 | Yes | Yes | Yes | Yes | Yes | Yes | No | Yes |
| Marques, 2010 | Yes | Yes | Yes | Yes | Yes | Yes | Yes | No |
| Ghule, 2021 | No | Yes | Yes | Yes | Yes | Yes | No | No |
| Asher Syed, 2023 | No | Yes | Yes | Yes | Yes | Yes | No | Yes |
| Ishizu, 2019 | No | Yes | Yes | Yes | Yes | Yes | No | Yes |
| Elizabeth Curtis, 2019 | No | Yes | Yes | Yes | Yes | Yes | No | Yes |
| Son Tran Thanh Bui, 2023 | No | Yes | Yes | Yes | Yes | Yes | No | No |
| Toshimitsu Kato, 2020 | No | Yes | Yes | Yes | Yes | Yes | Yes | No |
| Zhixuan Bai, 2015 | No | Yes | Yes | Yes | Yes | Yes | No | No |
| Georgio El Koubayat, 2024 | Yes | Yes | Yes | Yes | Yes | Yes | Yes | Yes |
| Jack B Keenan, 2016 | No | Yes | Yes | Yes | Yes | Yes | Yes | No |
| Harshwardhan Khandait, 2023 | Yes | Yes | Yes | Yes | Yes | Yes | Yes | No |
| Bo Lan Wu, 2023 | No | Yes | Yes | Yes | Yes | Yes | No | Yes |
| Asher Gorantla, 2023 | No | Yes | Yes | Yes | Yes | Yes | Yes | Yes |
| Ellie Senesael, 2018 | No | Yes | Yes | Yes | Yes | Yes | No | Yes |
| Yaoyang Liu, 2019 | No | Yes | Yes | Yes | Yes | Yes | No | Yes |
| Aashini Master, 2019 | No | Yes | Yes | Yes | Yes | Yes | No | No |
| Malak A Yazidi, 2023 | No | Yes | Yes | Yes | Yes | Yes | Yes | Yes |
| IOANNIS MOYSSAKIS, 2002 | No | Yes | Yes | Yes | Yes | Yes | No | Yes |
| Sanchari Banerjee, 2023 | No | Yes | Yes | Yes | Yes | Yes | Yes | Yes |
| P. David Myerowitz, 1974 | No | Yes | Yes | Yes | Yes | Yes | Yes | Yes |
| Soukaina Zaher, 2024 | No | Yes | Yes | Yes | Yes | Yes | No | Yes |
| Talwinder Nagi, 2022 | No | Yes | Yes | Yes | Yes | Yes | No | Yes |
| Akio Nakasu, 2018 | No | Yes | Yes | Yes | Yes | Yes | No | No |
| Patrick Perier, 2011 | Yes | Yes | Yes | Yes | Yes | Yes | No | No |
| Mariann Al-Jehani, 2021 | No | Yes | Yes | Yes | Yes | Yes | No | No |
| Geraldine E Ménard, 2008 | No | Yes | Yes | Yes | Yes | Yes | No | Yes |
| Carsten Schneider, 2003 | No | Yes | Yes | Yes | Yes | Yes | No | Yes |
| Shingo Taguchi, 2006 | Yes | Yes | Yes | Yes | Yes | Yes | Yes | Yes |
| Daniel Appelgren, 2018 | No | Yes | Yes | Yes | Yes | Yes | No | Yes |
| Daniel Unic, 2017 | No | Yes | Yes | Yes | Yes | Yes | No | Yes |
| Elizabeth S Aby, 2016 | No | Yes | Yes | Yes | Yes | Yes | No | Yes |
| Tomoyuki Takayama, 2008 | No | Yes | Yes | Yes | Yes | Yes | No | Yes |
| K. C. VAUGHTON, 1979 | No | Yes | Yes | Yes | Yes | Yes | Yes | Yes |

**Abbreviations:** Q1, patient demographic characteristics clearly described; Q2, patient history clearly described and presented as a timeline; Q3, current clinical condition clearly described; Q4, diagnostic tests and results clearly described; Q5, intervention or treatment procedure clearly described; Q6, post-intervention clinical condition clearly described; Q7, adverse or unanticipated events identified and described; Q8, takeaway lessons provided.

Supplementary Table 2B. JBI critical appraisal of the included case series

| Study (Author, Year) | Q1 Inclusion criteria | Q2 Condition measured reliably | Q3 Valid identification method | Q4 Consecutive inclusion | Q5 Complete inclusion | Q6 Demographics reported | Q7 Clinical information reported | Q8 Outcomes/follow-up reported | Q9 Site/clinic demographics | Q10 Appropriate statistics |
| --- | --- | --- | --- | --- | --- | --- | --- | --- | --- | --- |
| Yousef Mohammadi Kebar, 2019 | Yes | Yes | Yes | Yes | Yes | Yes | Yes | No | Yes | Yes |

**Abbreviations:** Q1, clear inclusion criteria; Q2, condition measured in a standard, reliable way for all participants; Q3, valid methods used for identification of the condition; Q4, consecutive inclusion of participants; Q5, complete inclusion of participants; Q6, participant demographics clearly reported; Q7, clinical information clearly reported; Q8, outcomes or follow-up results clearly reported; Q9, presenting site or clinic demographic information clearly reported; Q10, appropriate statistical analysis.
